1 Molecular surveillance of HIV, HBV, and HCV amongst blood donors in five Chinese  
2 regions

3

4 Xiaoting Lv<sup>1</sup>, Mary A Rodgers<sup>2</sup>, Peng Yin<sup>2</sup>, Ling Ke<sup>3</sup>, Ping Fu<sup>3</sup>, Binting Wu<sup>3</sup>, Yu Liu<sup>3\*</sup>

5

6 1. Abbott Laboratories, Research and Development, Shanghai, P. R. China.

7 2. Abbott Laboratories, Infectious Disease Research, Abbott Park, IL, USA.

8 3. Institute of Blood Transfusion, Chinese Academy of Medical Sciences, Chengdu, Sichuan,  
9 China.

10 \*Correspondence

11 Yu Liu, Institute of Blood Transfusion, Chinese Academy of Medical Sciences, Chengdu, Sichuan,  
12 China.

13 Email: [21615620@qq.com](mailto:21615620@qq.com)

14

15 **Abstract**

16 Hepatitis B (HBV), hepatitis C (HCV) and human immunodeficiency virus (HIV) are  
17 transfusion transmissible infections (TTIs) agents that threaten the safety of the blood  
18 supply. Surveillance of the variance of those viruses is an important way to monitor their  
19 diversity and evolution to improve safety in blood transfusion. In this study, we  
20 characterized the specimens of blood donors from 13 blood centers located in 5 Chinese  
21 regions.

22 Samples collected between 2014 and 2017 were screened with serological and  
23 molecular tests conducted on Abbott ARCHITECT and m2000 platforms. Sequencing  
24 was used to determine the classifications. The HBV immune escape mutations were  
25 also analyzed for assessing vaccine breakthrough risks and challenges for diagnostic  
26 tests. For HIV, 11 genotypes or recombinants were identified. The predominant  
27 genotype was C, which accounts for 42%. For HBV, the genotypes of B, C and D were  
28 identified, with B and C predominating. The major subgenotype was B2, comprising 84.1%  
29 of all infections. 79 out of 113 (69.9%) samples carried escape mutations in the “a”  
30 determinant region with 69 (87.3%) multiple mutants and 15 (19%) escape mutants  
31 which will affect HBsAg detection. For HCV, 7 genotypes or subtypes were identified.  
32 The major genotype was 1b (48%), followed by 6a (16.7%) and 2a & 3a (10%). This  
33 study provides the information of diversity of HBV, HCV and HIV strains circulating in  
34 blood centers from 5 regions in China. These data can also be scientific basis for  
35 development of detection assays that mitigate the impact of viral diversity on  
36 performance.

### 37 **Importance:**

38 The prevalence of TTIs in blood donations is important for evaluating blood safety and it  
39 can also reflect the burden of these disease among populations. Virus variance is threat  
40 to blood safety due to it may affect assays detection by nucleic acid, antigen and  
41 antibody-based methods in blood donors. HIV, HBV and HCV exhibit high degrees of  
42 genetic diversity, with different strains predominating in different geographic locations.  
43 The aim of this study is to assess the diversity of HBV, HCV and HIV among blood  
44 donors in China. In this study, 13 blood centers located in 5 Chinese regions were  
45 involved and the most informative phylogenetic regions of each virus had been  
46 sequenced. This will benefit for viral monitoring by subtype/genotype analyses to

47 determine whether the distributions of variants are changing over time and  
48 geographically, and to speculate whether previously rare subtypes are becoming  
49 established in blood donors in China.

## 50 **Introduction**

51 Hepatitis B (HBV), hepatitis C (HCV) and human immunodeficiency virus (HIV) are three  
52 important transfusion-transmitted infectious agents which are threats to blood safety in  
53 China (1). Before 1998, a high number of HBV, HCV, and HIV infections in China were  
54 from a blood transfusion. Since the three agents were included for blood screening,  
55 especially nucleic acid testing of the three agents conducted for all blood donors, the  
56 infection of the three agents through blood transfusion decreased significantly. However,  
57 the threat of these agents to blood safety still exists in China (2).

58 Several studies have reported the molecular epidemiological data of the three agents in  
59 general populations in China. The first nationwide molecular epidemiological survey of  
60 HIV conducted in 1996-1998 showed that subtype B'/B (47.5%), subtype C (34.3%), and  
61 CRF01\_AE (9.6%) were the most predominant strains in China (3). However, the  
62 second and third surveys conducted in 2002-2003 and 2006 indicated that the  
63 proportions of HIV-1 genotypes had sharply shifted. The subtype B'/B and C have been  
64 replaced by CRF07\_BC, CRF01\_AE, and CRF08\_BC (4, 5).

65 HBV and HCV genotypes have geographic distribution characteristics (6-8). HBV has 9  
66 genotypes (A-I) (9) and more than 35 subgenotypes that have been identified (10).  
67 Genotypes B and C are the predominant HBV strains in China. North of the Qinling  
68 Mountains-Huaihe River Line, genotype C (75.3%) is dominating with a small portion of  
69 types B (23.4%) and D (1.3%) (11). In the south of China, the major genotype is B (12).  
70 The distribution of HCV genotypes is closely related to the modes of HCV acquisition

71 (13). In the late 1980s and early 1990s in China, illegal blood collection and donation  
72 greatly promoted the spread of HCV genotype 1 and 2 (14). In 1998, mandatory HCV  
73 screening of blood and blood products was implemented in China, gradually changing  
74 the predominant mode of HCV transmission from direct contact with human blood to  
75 intravenous and percutaneous drugs used (15). Consequently, the HCV genotype  
76 distribution in China has been shifting over time, especially in the southwestern  
77 provinces (16). In China, the only multicenter investigation of the distribution of HCV  
78 genotypes, conducted in 2011, indicated that the most prevalent HCV subtype was 1b,  
79 followed by 2a (17). Over time, the prevalence of genotypes 3, 6, and new mixed-  
80 infection genotype has also been increasing (18).

81 These data indicate the diversity of HIV, HBV, and HCV and the importance of  
82 monitoring virus diversity and evolution for blood safety in China. Except for the diversity  
83 of genotypes, mutations in the sequences of these agents may lead to false-negative  
84 detection in blood screening and introduce TTIs that jeopardizes the blood safety. Take  
85 the mutants of HBV as an example, the mutants in “a” determinant region which located  
86 in the major immunogenic region can lead to false-negative detection, vaccine escape  
87 and may evade natural immune responses (19). In previous reports, the sG145R mutant  
88 is the most widely reported. Besides sG145R, the K141E, T131I, and insertion of amino  
89 acids between 123 and 124 can affect the structure of HBsAg to cause vaccine escape  
90 as well (20). Recently, other mutants in “a”-determinant region are linked to vaccine  
91 escape, like T116N, P120S/E, I/T126A/N/I/T126A/N/I/S, Q129H/R, M133L, K141E,  
92 P142S, and D144A/E (21)

93 Considering the importance of the molecular epidemiological characteristics of these  
94 agents in blood donors for blood safety, we performed molecular surveillance of HIV,

95 HBV, and HCV to determine the genotype diversity and characteristics of HBV S region  
96 amongst blood donors in 5 Chinese regions.

## 97 **Methods**

### 98 Samples

99 Retrospective leftover plasma from 216 HIV, 207 HBV, or 204 HCV available positive  
100 blood donations collected from 13 blood centers in four provinces and one municipality  
101 (Chongqing, Guangxi, Henan, Sichuan, Xinjiang) between 2014 and 2017 were included  
102 in the study. All positive donations were screened with two ELISA assays as previously  
103 described at the blood centers where they were first collected (22). These samples were  
104 confirmed positive in the laboratory of IBT. The viral load and serology screening tests  
105 were performed on Abbott ARCHITECT (HIV Combo Ag/Ab, HBsAg, and anti-HCV) and  
106 m2000 (RealTime HIV-1, HBV, HCV) instruments per manufacturer's instructions. This  
107 study was approved by the IRB of the Institute of Blood Transfusion. The written consent  
108 was obtained from all donors at the time of donation.

### 109 Viral nucleic acid extraction and amplification

110 HBV DNA was extracted from 200  $\mu$ L plasma using a QIA amp<sup>®</sup> DNA Blood Mini Kit  
111 (QIAGEN, Hilden, Germany) according to the manufacturer's instructions and 50  $\mu$ L of  
112 eluted DNA was stored at -70 °C until use. The HBV S and Pol regions were amplified by  
113 PCR using a thermal cycler (Veriti, Applied Biosystems, MA, USA) with 56F-  
114 CCTGCTGGTGGCTCCAGTTC, 645F-TATGTTGCCCGTTTGTCTCTAAT as the  
115 forward primer and 1253R-GCAGTATGGATCGGCAGAGGAG,1580R-  
116 AGGTGAAGCGAAGTGACACACG as the reverse primer respectively for the first round  
117 PCR. The first round PCR was performed in a total volume of 50  $\mu$ L, with the following  
118 reaction: denaturation at 95 °C for 10 minutes, followed by 35 cycles of 15 seconds of

119 denaturation at 95 °C, 30 seconds of annealing at 53 °C, and 30 seconds of extension at  
120 72 °C, with a final extension at 72 °C for 5 minutes. The second round PCR condition is  
121 the same as the first round PCR. The forward primers is 178F-  
122 CCTAGGACCCCTGCTCGTGTTACAGGC, 784F-TCCCTTTATACCGCTGTTACCAAT  
123 and reverse primer are 1186R-CCAGTGGGGGTTGCRTCAGC, 1421R-  
124 CGCYGACGGGACGTARACAA in S and Pol region, respectively.

125 HCV and HIV RNA were extracted from 200 µL plasma using a QIA amp® Viral RNA  
126 Mini Kit (QIAGEN, Hilden, Germany) according to the manufacture's instruction and 50  
127 µL of eluted RNA was stored at -70 °C until use. The HCV 5'UTR-core was amplified,  
128 one-step RT-PCR was performed with 15 µL of RNA, forward primer 127F-  
129 TCCCGGGAGAGCCATAGT, reverse primers 852Rb-  
130 AGGAAGATAGAGAAAGAGCAACC and 852Rc-AGGAAGATAGAAAAGGAGCAACC  
131 using QIAGEN One-Step RT-PCR kit (QIAGEN GmbH, Hilden, Germany) according to  
132 the manufacturer's instructions. Cycling conditions were 50 °C for 30 minutes, 95 °C for  
133 15 minutes, 50 cycles of 94 °C for 15 seconds, 50 °C for 30 seconds and 72 °C for 1  
134 minute 30 seconds, and final extension at 72 °C for 10 minutes.

135 The env IDR (immunodominant region of gp41), pol integrase and 5'LTR were amplified  
136 with forwarding primers JH35F-TGARGGACAATTGGAGAARTGA, Poli5-  
137 CACACAAAGGTATTGGAGGAAATG, MGAGrev-GCTCTCGCACCCATCTCTCT  
138 respectively; and reverse primers JH38R-GGTGARTATCCCTKCCTAAC, Poli8-  
139 TAGTGGGATGTGTACTIONTCTGAAC and MRU3fwd-GAGCCTGGGAGCTCTCTG. The  
140 cycling conditions for env IDR are 50 °C for 30 minutes, then 95 °C for 15 minutes and  
141 50 cycles with 94 °C for 15 seconds, 50 °C for 30 seconds and 72 °C for 1 minute.  
142 Finalize with 72 °C for 7 minutes. The condition for Pol Integrase is 50 °C for 30 minutes,  
143 then 95 °C for 15 minutes and 50 cycles with 94 °C for 15 seconds, 60 °C for 30 seconds

144 and 72 °C for 1 minute. Finalize with 72 °C for 7 minutes. 5UTR cycling condition is 50  
145 °C for 30 minutes, then 95 °C for 15 minutes and 50 cycles with 94 °C for 15 seconds, 55  
146 °C for 30 seconds and 72 °C for 1 minute. Finalize with 72 °C for 7 minutes.

#### 147 Sequencing

148 Nucleotide fragments amplified from above were tested for molecular characterization by  
149 Sanger sequencing of subgenomic amplicons by Sangon Biotech (Shanghai, China).

#### 150 HIV phylogenetic classification

151 Viral sequences were aligned with reference strains, including all subtypes and CRFs 1-  
152 90 by CLUSTALW. Alignments were manually edited in BioEdit 7.0.4.1 or higher to  
153 remove gaps and Neighbor-Joining phylogenetic inference was performed using PHYLIP  
154 3.5c (J. Felsenstein, University of Washington, Seattle, USA). Evolutionary distances  
155 were estimated with Dnadist (Kimura two-parameter method) and phylogenetic  
156 relationships were determined by Neighbor (neighbor-joining method). The Branch  
157 reproducibility of trees was evaluated using Seqboot (100 replicates) and Consense.  
158 Programs were run with default parameters. For specimens clustering outside of the  
159 CRF02\_AG reference branch, a second alignment and phylogenetic tree analysis was  
160 completed, including all subtypes and 72 CRFs. Classification was assigned for  
161 specimens with bootstrap support of 70 or higher. Phylogenetic trees were visualized in  
162 FigTree v1.4.2 (University of Edinburgh, UK).

#### 163 HCV phylogenetic classification

164 Sequence data were edited and assembled using Sequencher version 5.4.6 (Gene  
165 Codes Corp, Ann Arbor, MI, USA). Sequences were aligned to N=117 reference strains,  
166 including subgenotypes of HCV genotypes 1-7 by MUSCLE in Sequencher. Gaps were

167 manually removed in BioEdit version 7.0.4.1(25), and Neighbor-Joining phylogenetic  
168 inference was performed using the PHYLIP 3.5c (J. Felsenstein, University of  
169 Washington, Seattle, WA, USA) software package as previously described (23).

170 HBV phylogenetic classification and mutation analysis

171 Sequence data was analyzed using Sequencher version 5.2.3 or higher (Gene Codes  
172 Corp., Ann Arbor, MI). To determine the genotype of HBV, the DNA sequences were  
173 aligned with genotype reference sequences using the CLUSTALW method and manually  
174 edited in BioEdit 7.0.4.1 or higher (24). Phylogenetic trees were prepared as described  
175 above for HIV and visualized in FigTree v1.4.2 (University of Edinburgh, UK). HBsAg  
176 subtype was determined as described in a previous paper (25). HBsAg escape  
177 mutations were identified using the web-based program Geno2pheno (hbv) v2.0  
178 (Informatik).



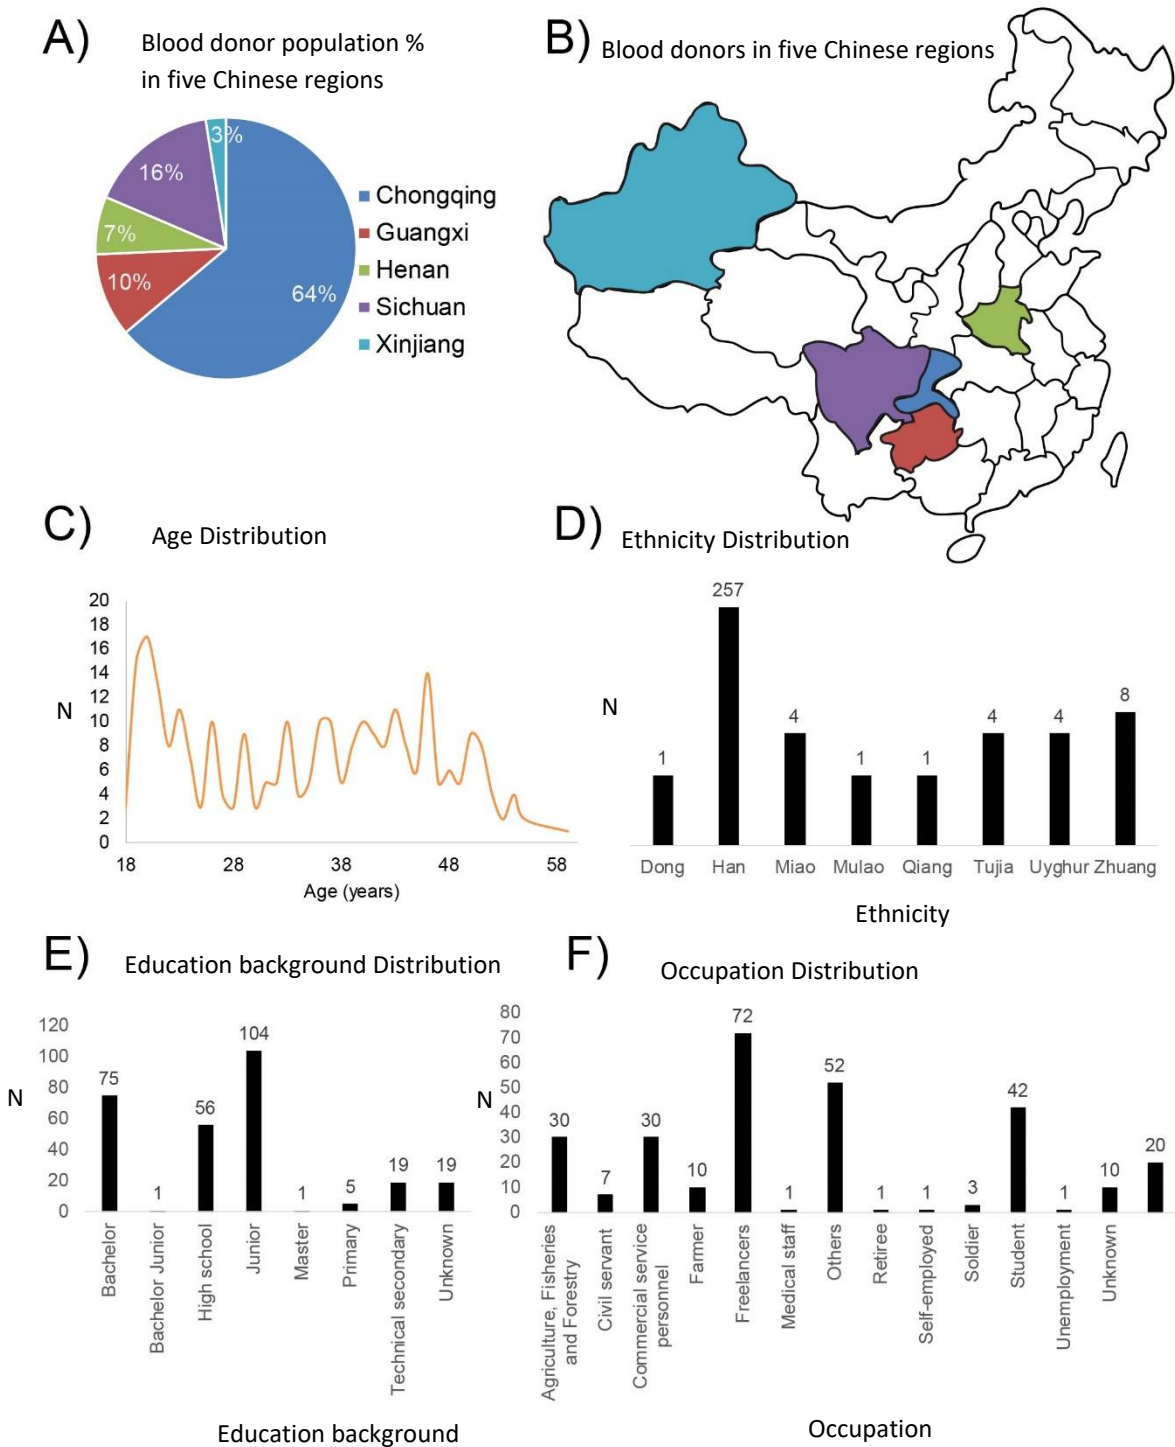

179

Education background

Occupation

180

Figure 1 Demographic characteristics of blood donors

181

## 182 **Results**

### 183 Demographics

184 To determine the HIV, HBV, and HCV strains present amongst blood donors in China,  
185 seropositive plasma specimens were collected from 13 blood centers in Chongqing,  
186 Guangxi, Henan, Sichuan, and Xinjiang regions between 2014 and 2017.

187 Specimens were identified as HIV antibody, HBV surface antigen (HBsAg), or HCV  
188 antibody positive at each collection site by two independent ELISA tests. Subsequent  
189 viral load testing with the m2000 RealTime HIV, HBV, or HCV test (Abbott Molecular  
190 Diagnostics, Des Plaines, IL, USA) confirmed viral nucleic acids were present in a total  
191 of 626 specimens (N=215 HIV, N=207 HBV, N=204 HCV) for further characterization of  
192 the viral strains present. Subgenomic direct amplicon sequencing was performed for  
193 specimens with sufficient viral load, and at least one sequence was obtained for N=107  
194 HIV, N=113 HBV, and N=60 HCV specimens (Table 1). The collection sites and  
195 demographics of the donors of these sequenced specimens were summarized in Figure  
196 1. The majority of donors were male (N=200, 71.4%), Han (N=257, 91.8%), and from  
197 Chongqing (N=179, 63.9%). Donor ages ranged from 18 to 59 years old, and the  
198 average age was 35. Junior, Bachelor and High school students account for 235 (84%).  
199 Technical secondary school, Primary school, Master and Bachelor Junior account for 26  
200 (9%), Other 19 (6.79%) donors were unknown education status. The most represented  
201 occupation was freelancers 72 (25.71%), followed by students 42 (15%), Agriculture,  
202 Fisheries and Forestry 30 (10.71%), and Commercial service 30 (10.71%).

203

204

**Table 1 Blood donors from 13 blood centers of 4 provinces and 1 municipality**

| Provinces/Municipality       | Characteristics |           |            | Grand Total |
|------------------------------|-----------------|-----------|------------|-------------|
|                              | HBV             | HCV       | HIV        |             |
| <b>Chongqing</b>             | <b>112</b>      | <b>26</b> | <b>41</b>  | <b>179</b>  |
| Chongqing Blood Center       | 112             | 26        | 41         | 179         |
| <b>Guangxi</b>               |                 | <b>20</b> | <b>9</b>   | <b>29</b>   |
| Liuzhou Blood Center         |                 | 20        | 9          | 29          |
| <b>Henan</b>                 |                 | <b>2</b>  | <b>18</b>  | <b>20</b>   |
| Henan Red Cross Blood Center |                 |           | 15         | 15          |
| Luoyang Blood Center         |                 | 2         | 3          | 5           |
| <b>Sichuan</b>               | <b>1</b>        | <b>10</b> | <b>34</b>  | <b>45</b>   |
| Bazhong Blood Center         |                 |           | 3          | 3           |
| Chengdu Blood Center         |                 |           | 6          | 6           |
| Deyang Blood Center          |                 |           | 5          | 5           |
| Guangyuan Blood Center       |                 |           | 4          | 4           |
| Meishan Blood Center         |                 |           | 7          | 7           |
| Mianyang Blood Center        | 1               | 10        | 4          | 15          |
| Nanchong Blood Center        |                 |           | 1          | 1           |
| Ya'an Blood Center           |                 |           | 4          | 4           |
| <b>Xinjiang</b>              |                 | <b>2</b>  | <b>5</b>   | <b>7</b>    |
| Urumqi Blood Center          |                 | 2         | 5          | 7           |
| <b>Grand Total</b>           | <b>113</b>      | <b>60</b> | <b>107</b> | <b>280</b>  |

205

206 HIV genotypes distribution

207 215 HIV samples were tested for nucleic acid, and all had detectable viral load. Out of  
 208 167 HIV with viral load >1000IU/mL, at least one sequence was obtained from 107 (64%)  
 209 samples, not including 5'LTR. Some samples failed in sequencing may due to low viral  
 210 load or RNA degradation during transport or sequence variations at the primer binding  
 211 sites (26). Among 215 HIV positive samples, 173 (80%) samples were collected in 2016,  
 212 22 (10%), and 20 (9%) were collected in 2015 and 2014, respectively. The majority of  
 213 gender was male 177 (82%). About 99 (46%) HIV infected individuals' education level  
 214 was higher than or equivalent to a high school degree. 71 (33%) individuals were Junior  
 215 degree. Similar results were described in a previous report (27). The freelancers (53,

216 25%) were major infected populations, followed by commercial service personnel (28,  
217 13%), then farmer (14, 7%), and others (45, 20%) with the unknown occupation.

218 Two fragments, *env* IDR and *pol* INT, were taken into account for analysis except for the  
219 samples, which failed to obtain both of those two regions, to determine genotypes of 107  
220 sequenced samples. Two genotypes B and C were identified with four types of CRFs  
221 (CRF 01, CRF07, CRF08, CRF55) and 5 URFs (URF\_0107, URF\_01C, URF\_0708,  
222 URF\_BU and URF\_CU). The majority of samples genotype were C (42%), followed by  
223 CRF01\_AE (24%) and CRF07 (17%) (Table 2), which was consistent with a previous  
224 report (28). In 45 genotype C samples, 15 samples, which successfully amplified both  
225 Env and Pol regions, were finally classified. There were 30 other samples classified in a  
226 single Pol region. There should be more C type recombinants if we can apply additional  
227 Env region for genotyping. Besides major types of C, CRF01\_AE and CRF07, the  
228 residual CRFs and URFs were all other BC or BC and AE recombinant forms (data not  
229 shown)

**Table 2 HIV classifications.**

| HIV Classification | Number     | Percentate % |
|--------------------|------------|--------------|
| B                  | 2          | 1.9          |
| C                  | 45         | 42.1         |
| CRF01_AE           | 26         | 24.3         |
| CRF07              | 18         | 16.8         |
| CRF08              | 4          | 3.7          |
| CRF55              | 6          | 5.6          |
| URF_0107           | 1          | 0.9          |
| URF_01C            | 1          | 0.9          |
| URF_0708           | 1          | 0.9          |
| URF_BU             | 1          | 0.9          |
| URF_CU             | 2          | 1.9          |
| <b>Grand Total</b> | <b>107</b> | <b>100</b>   |

230 Amongst 107 classified samples, 75% was from Chongqing and Sichuan, which is  
231 located in the Southwest of China (Table 3). The C was the majority genotype in  
232 Chongqing, Sichuan, and Xinjiang s. Genotype C, CRF01, CRF07 and CRF55 were  
233 almost equally distributed in Henan province. In Guang Xi province, the major genotype  
234 was CRF01, which was concordant with a previous study (28).

235

236

237

238

**Table 3 HIV distribution in different provinces**

| Blood Centers                 | Classifications |    |       |       |       |       |          |         |          |        |        | Sample numbers from Province/municipality |          |
|-------------------------------|-----------------|----|-------|-------|-------|-------|----------|---------|----------|--------|--------|-------------------------------------------|----------|
|                               | B               | C  | CRF01 | CRF07 | CRF08 | CRF55 | URF_0107 | URF_01C | URF_0708 | URF_BU | URF_CU |                                           |          |
| <b>Chongqing Blood Center</b> |                 | 25 | 4     | 7     | 3     | 1     |          |         | 1        |        |        |                                           | 41 (38%) |
| <b>Guang Xi Province</b>      | 1               | 1  | 6     |       |       |       |          |         |          |        | 1      |                                           | 9 (8%)   |
| Liuzhou Blood Center          | 1               | 1  | 6     |       |       |       |          |         |          |        | 1      |                                           |          |
| <b>Henan Province</b>         | 1               | 3  | 4     | 5     |       | 3     | 1        | 1       |          |        |        |                                           | 18 (17%) |
| Henan Red Cross Blood Center  |                 | 2  | 4     | 5     |       | 2     | 1        | 1       |          |        |        |                                           |          |
| Luoyang Blood Center          | 1               | 1  |       |       |       | 1     |          |         |          |        |        |                                           |          |
| <b>Sichuan Province</b>       |                 | 12 | 12    | 6     | 1     | 2     |          |         | 1        |        |        |                                           | 34 (32%) |
| Chengdu Blood Center          |                 | 2  | 2     | 2     |       |       |          |         |          |        |        |                                           |          |
| Meishan Blood Center          |                 | 1  | 3     | 2     |       | 1     |          |         |          |        |        |                                           |          |
| Deyang Blood Center           |                 | 2  | 2     | 1     |       |       |          |         |          |        |        |                                           |          |
| Ya'an Blood Center            |                 | 2  | 1     |       | 1     |       |          |         |          |        |        |                                           |          |
| Bazhong Blood Center          |                 | 1  | 1     | 1     |       |       |          |         |          |        |        |                                           |          |
| Mianyang Blood Center         |                 | 1  | 1     |       |       |       |          |         | 1        |        |        |                                           |          |
| Guangyuan Blood Center        |                 | 2  | 2     |       |       |       |          |         |          |        |        |                                           |          |
| Nanchong Blood Center         |                 | 1  |       |       |       |       |          |         |          |        |        |                                           |          |
| <b>Xinjiang Province</b>      |                 | 4  |       |       |       |       |          |         |          |        | 1      |                                           | 5 (5%)   |
| Urumqi Blood Center           |                 | 4  |       |       |       |       |          |         |          |        | 1      |                                           |          |

240 HBV genotypes distribution and escape mutations

241 207 HBV samples tested for viral load were from Chongqing and Mianyang blood  
242 centers of Sichuan province located in the southwest of China. The mean donor age was  
243  $38.7 \pm 11.3$  years. The major ethnicity was Han (98.1%) with a few minorities of Dong,  
244 Miao and Tujia. The main education level was junior degree (37.4%), bachelor (31.2%)  
245 and high school degree (19.7%) (Table 1, E). A total of 120 samples were tested on  
246 M2000 and found VL > 100IU/ml. 113 among these samples had been successfully  
247 sequenced with at least one sequence. The HBV genotype/subgenotype was analyzed.  
248 The three genotypes B, C and D were identified (Table 4). Genotype B and C were  
249 predominant. Genotype B was the most common genotype (89.4%), and B2 was a major  
250 subgenotype (84.1%). 9.8% genotype C and 0.9% genotype D were identified. This was  
251 in line with a previous publication (29), but in our study, the proportion of genotype B  
252 was higher, which may be due to almost all samples analyzed being from a single  
253 Chongqing blood center located in the southwest of China.

**Table 4 HBV classifications.**

| HBV Classification | Number     | Percentage % |
|--------------------|------------|--------------|
| B                  | 6          | 5.3          |
| B2                 | 95         | 84.1         |
| C                  | 1          | 0.9          |
| C1                 | 2          | 1.8          |
| C2                 | 8          | 7.1          |
| D                  | 1          | 0.9          |
| <b>Grand Total</b> | <b>113</b> |              |

254

255

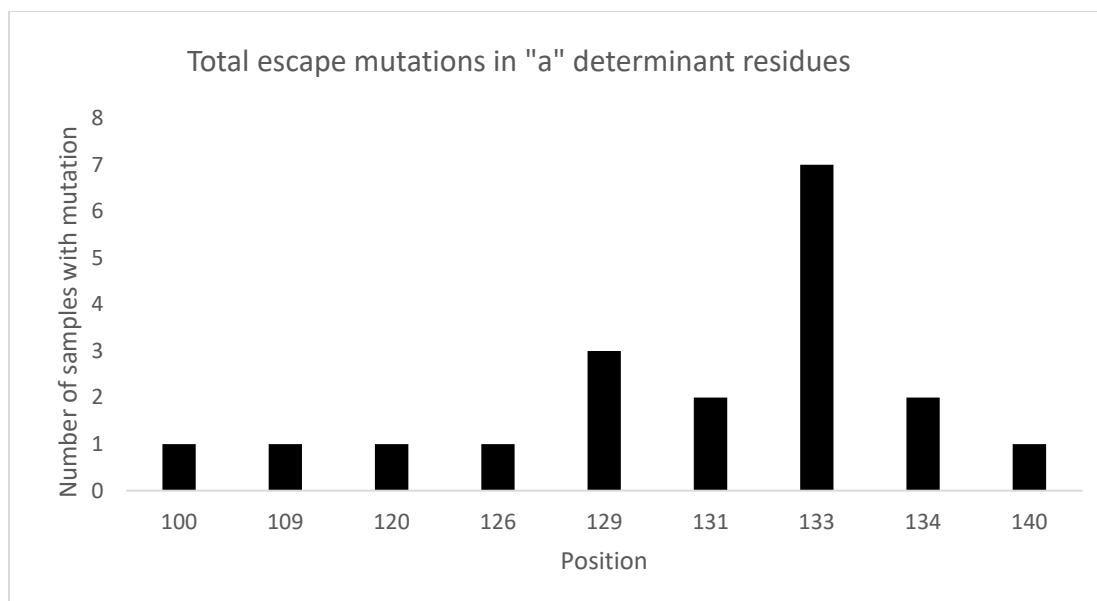

256

257 Figure 2: The distribution of escape mutants in "a" determinant region of HBV S region.

258 The mutations in the S open reading frame region were analyzed as well. 79 out of 113  
259 (69.9%) samples were found to have variants in "a" determinant region where antibodies  
260 predominantly target. The "a" determinant is a hydrophilic region of the HBV surface  
261 antigen (HBsAg) protein that was important for HBsAg detection by the immune  
262 response or diagnostic tests. 69 out of 79 (87.3%) samples had multiple mutations. And  
263 19 (24.1%) had escape mutants (Figure 2), which can escape antibody detection and  
264 neutralization. The mutation rate was much higher than previous report 17.1% (29) in  
265 blood donors in China, also higher than reported elsewhere, including Japan (24%) (30),  
266 Korea (50%) (31), France (28%) (32) and Spain (40%) (33). In this study, there was no  
267 mutant identified in position 145, which was the most widely reported. The most frequent  
268 mutations found (Figure 2) in the study were located in position 133, then 129 and 134,  
269 which was different from a previous report (34).

270 HCV genotypes distribution

271 203 HCV samples were collected from 6 blood centers and were tested viral load  
272 positive, 60 (from 5 blood centers) were sequenced successfully with at least one



273 sequence in the 5'UTR-Core region. 66.7% of donors were male and 33.3% were female.  
274 The mean age of donors was 36.2±10.6. The majority of ethnicity was Han (48, 80.0%)  
275 and with minorities Zhuang (6, 10%), Miao (1, 1.7%), Mulao (1, 1.7%), Qiang (1, 1.7%),  
276 Tujia (1, 1.7%) and Uyghur (2, 3.3%) (Table1, D). In total, 7 genotypes and  
277 subgenotypes were identified, namely, 6, 6a, 1a, 1b, 2a, 3a, 3b. The predominant  
278 genotype was 1b (N=29, 48%), followed by 6a (N=10, 17%), 2a (N=6, 10%), 3a (N=6,  
279 10%) and small proportion of 3b, 6 and 1a (Table 5). The distribution of HCV  
280 classifications was concordant with a previous national wide investigation of HCV in  
281 mainland China, which reported the major HCV genotypes were 1b and 2a, accounting  
282 for 54.5% and 16.7%, respectively (35). In our study, 6a was a second major genotype.  
283 It was the dominant genotype in Liuzhou blood bank located in the south of China, which  
284 was similar to the publication of HCV subtypes of blood donors from 17 provinces and  
285 municipalities (36).

**Table 5 HCV classifications.**

| HCV Classification | Number    | Percentage % |
|--------------------|-----------|--------------|
| 6                  | 3         | 5.0          |
| 1a                 | 2         | 3.3          |
| 1b                 | 29        | 48.3         |
| 2a                 | 6         | 10.0         |
| 3a                 | 6         | 10.0         |
| 3b                 | 4         | 6.7          |
| 6a                 | 10        | 16.7         |
| <b>Grand Total</b> | <b>60</b> |              |

286

287 **Discussion**

288 This is the first study to demonstrate that the strains of HIV, HBV and HCV commonly  
289 found in Chinese blood donors are detected by Abbott serology and molecular tests.  
290 Attempts to sequence and classify viremic samples are very important in providing  
291 evidence for blood screening safety in China.

292 HIV recombination is one of the main mechanisms contributing significantly to HIV-1  
293 genetic diversity and unique recombinant forms are precursors of CRFs. Therefore, the  
294 monitoring of URFs will be helpful to the surveillance of new CRFs. CRF01\_AE was  
295 found to be dominant in the transmitted sexual population in China (37), while  
296 CRF\_07BC and CRF\_08BC were mainly prevalent in IDU population (38). In addition,  
297 CRF07\_BC was the most predominant strain in the north-western region, which  
298 suggested a lack of incoming transmissions from other regions (4). Although CRF01\_AE  
299 only accounts for 5% of HIV cases worldwide, it plays an important role in China (39). In  
300 our study, the finding is in line with the previous study with the fact that the major CRFs  
301 are BC recombinant and the predominant CRF in the south of China is CRF01\_AE. The  
302 limitation of the analysis is that most of the samples have one region (Pol or Env)  
303 involved in the analysis, which doesn't have a breakpoint to judge whether it's  
304 CRF07\_BC or not. That's why C is the majority genotype in our study. If we had  
305 complete genomes for classification, the CRF07\_BC's proportion should be higher.

306 Surveillance of HBV variants can help in monitoring the diversity and evolution of HBV.  
307 The investigation of HBV genotypes and mutations in blood donors will provide evidence  
308 to improve current sensitivity and specificity of screening assays and reduce TTIs in  
309 blood transfusion. According to the previous study (29), genotype B and C were the  
310 major genotypes in Chinese blood donors that is consistent with our study. However,  
311 other studies reported that genotype C has a higher prevalence in patients than  
312 genotype B (34, 40, 41), which is different from in blood donors. The most-reported

313 mutant in “a” determinant is G145R which will affect HBsAg detection (21, 42). In our  
314 study, there is 69.9% of the HBV samples were found mutants in “a” determinant region  
315 with a distribution of escape mutants in "a" determinant region 69 (87.3%) multiple  
316 mutants and 19 (24.1%) escape mutants which will affect HBsAg detection. It indicates  
317 possible false-negative results of blood screening of HBsAg and further increase the  
318 potential threat of HBV to blood safety in China, which needs to be clarified by further  
319 studies.

320 Long-term multi-center molecular surveillance of HIV, HBV, and HCV amongst blood  
321 donors provides a detailed picture of the diversity distribution and variations, including  
322 new mutations and new subgenotypes occurrence in blood donors. It is very crucial to  
323 provide an efficient way to reduce transfusion-transmitted infections of HIV, HBV, and  
324 HCV and to improve blood safety further.

325

### 326 **Acknowledgements**

327 The authors thank the technical support from Ana Vallari, Barb Harris, and Ana Olivo in  
328 the Abbott Global Surveillance Program. In addition, this work was supported by Abbott  
329 Diagnostics and the CAMS Innovation Fund for Medical Sciences (CIFMS, No.2016 -  
330 I2M - 1 - 018).

331

332

333

334

335

336 **References**

- 337 1. **Shan H, Wang JX, Ren FR, Zhang YZ, Zhao HY, Gao GJ, Ji Y, Ness PM.** 2002. Blood  
338 banking in China. *Lancet* **360**:1770-1775.
- 339 2. **MoH C.** 2006. 2005 Update on the HIV/AIDS Epidemic and Response in China. UNAIDS W,  
340 Beijing, China
- 341 3. **Shao Y, Su L, Xing H, Lin P, Liu Y, Yang F.** 2000. Molecular epidemic research in China.  
342 *Bull Med Res* **29**:19-20.
- 343 4. **He X, Hui X, Ruan Y, Hong K, Cheng C, Hu Y, Xin R, Wei J, Feng Y, Hsi JH, Takebe Y, Shao**  
344 **Y.** 2012. A comprehensive mapping of HIV-1 genotypes in various risk groups and  
345 regions across China based on a nationwide molecular epidemiologic survey. *PLoS One* **7**.  
346 5. **Zhong P, Pan Q, Ning Z, Xue Y, Gong J, Zhen X, Zhou L, Sheng F, Zhang W, Gai J, Cheng**  
347 **H, Yue Q, Xing H, Zhuang M, Lu W, Shao Y, Kang L.** 2007. Genetic diversity and drug  
348 resistance of human immunodeficiency virus type 1 (HIV-1) strains circulating in  
349 Shanghai. *AIDS Res Hum Retroviruses* **23**:847-856.
- 350 6. **Shepard CW, Finelli L, Alter MJ.** 2005. Global epidemiology of hepatitis C virus infection.  
351 *Lancet Infect Dis* **5**:558-567.
- 352 7. **Norder H, Courouce AM, Coursaget P, Echevarria JM, Lee SD, Mushahwar IK,**  
353 **Robertson BH, Locarnini S, Magnius LO.** 2004. Genetic diversity of hepatitis B virus  
354 strains derived worldwide: genotypes, subgenotypes, and HBsAg subtypes. *Intervirology*  
355 **47**:289-309.
- 356 8. **Lindh M, Andersson AS, Gusdal A.** 1997. Genotypes, nt 1858 variants, and geographic  
357 origin of hepatitis B virus--large-scale analysis using a new genotyping method. *J Infect*  
358 *Dis* **175**:1285-1293.
- 359 9. **Kramvis A, Arakawa K, Yu MC, Nogueira R, Stram DO, Kew MC.** 2008. Relationship of  
360 serological subtype, basic core promoter and precore mutations to  
361 genotypes/subgenotypes of hepatitis B virus. *J Med Virol* **80**:27-46.
- 362 10. **Gao S, Duan ZP, Coffin CS.** 2015. Clinical relevance of hepatitis B virus variants. *World J*  
363 *Hepatol* **7**:1086-1096.
- 364 11. **Li HM, Wang JQ, Wang R, Zhao Q, Li L, Zhang JP, Shen T.** 2015. Hepatitis B virus  
365 genotypes and genome characteristics in China. *World J Gastroenterol* **21**:6684-6697.
- 366 12. **Sunbul M.** 2014. Hepatitis B virus genotypes: global distribution and clinical importance.  
367 *World J Gastroenterol* **20**:5427-5434.
- 368 13. **Chlabicz S, Flisiak R, Kowalczyk O, Grzeszczuk A, Pytel-Krolczuk B, Prokopowicz D,**  
369 **Chyczewski L.** 2008. Changing HCV genotypes distribution in Poland--relation to source  
370 and time of infection. *J Clin Virol* **42**:156-159.
- 371 14. **Yin W, Huang C, Qiu F, Liu L, Wang F, Zhou J, Zhang Y, Bi S.** 2015. Risk factors of  
372 hepatitis C virus transmission and genotype distribution in former blood donors from  
373 Chinese rural area. *BMC Public Health* **15**:184.
- 374 15. **Xia X, Luo J, Bai J, Yu R.** 2008. Epidemiology of hepatitis C virus infection among  
375 injection drug users in China: systematic review and meta-analysis. *Public Health*  
376 **122**:990-1003.
- 377 16. **Zhou Y, Wang X, Mao Q, Fan Y, Zhu Y, Zhang X, Lan L, Jiang L, Tan W.** 2009. Changes in  
378 modes of hepatitis C infection acquisition and genotypes in southwest China. *J Clin Virol*  
379 **46**:230-233.

- 380 17. **Rao H, Wei L, Lopez-Talavera J, Shang J, Chen H, Li J, Xie Q, Gao Z, Wang L, Wei J, Jiang**  
381 **J, Sun Y, Yang R, Li H, Zhang H, Gong Z, Zhang L, Zhao L, Dou X, Niu J, You H, Chen Z,**  
382 **Ning Q, Gong G, Wu S, Ji W, Mao Q, Tang H, Li S, Wei S, Sun J, Jiang J, Lu L, Jia J, Zhuang**  
383 **H.** 2014. Distribution and clinical correlates of viral and host genotypes in Chinese  
384 patients with chronic hepatitis C virus infection. *J Gastroenterol Hepatol* **29**:545-553.
- 385 18. **Su YY, Liu HX, Wang N.** 2013. [Hepatitis C virus genotypes in China: a systematic review].  
386 *Zhonghua Liu Xing Bing Xue Za Zhi* **34**:80-84.
- 387 19. **Thakur V, Kazim SN, Guptan RC, Hasnain SE, Bartholomeusz A, Malhotra V, Sarin SK.**  
388 2005. Transmission of G145R mutant of HBV to an unrelated contact. *J Med Virol* **76**:40-  
389 46.
- 390 20. **Seddigh-Tonekaboni S, Waters JA, Jeffers S, Gehrke R, Ofenloch B, Horsch A, Hess G,**  
391 **Thomas HC, Karayiannis P.** 2000. Effect of variation in the common "a" determinant on  
392 the antigenicity of hepatitis B surface antigen. *J Med Virol* **60**:113-121.
- 393 21. **Ly TD, Servant-Delmas A, Bagot S, Gonzalo S, Ferey MP, Ebel A, Dussaix E, Laperche S,**  
394 **Roque-Afonso AM.** 2006. Sensitivities of four new commercial hepatitis B virus surface  
395 antigen (HBsAg) assays in detection of HBsAg mutant forms. *J Clin Microbiol* **44**:2321-  
396 2326.
- 397 22. **Wang M-Y, Devare S, Liu J-F, Lv X-T, Yin P, Guo N, Fu P, Wu B-T, Yin Y-H, Ke L, Li X, Shan**  
398 **H, Liu Y.** 2019. Comparison of three immunoassay systems for screening of HIV infection  
399 in blood donation in China. *Annals of Blood* **4**.
- 400 23. **Xia GL, Liu CB, Cao HL, Bi S, Zhan MY, Su CA, Nan JH, Qi XQ.** 1992. Prevalence of  
401 hepatitis B and C virus infections in the general Chinese population: results from a  
402 nationwide cross-sectional seroepidemiologic study of hepatitis A, B, C, D, and E virus  
403 infections in China, 1992. *Int Hepatol Commun* **1996**:62-73.
- 404 24. **Hall TA.** 1999. BioEdit: A User-Friendly Biological Sequence Alignment Editor and  
405 Analysis Program for Windows 95/98/NT. *Nucleic Acids Symposium Series* **41**:95-98.
- 406 25. **Purdy MA, Talekar G, Swenson P, Araujo A, Fields H.** 2007. A new algorithm for  
407 deduction of hepatitis B surface antigen subtype determinants from the amino acid  
408 sequence. *Intervirology* **50**:45-51.
- 409 26. **Yao X, Wang H, Yan P, Lu Y, Lin H, Chen L, Ng J, Lau E, Liu L, Wu J, Chen Z.** 2012. Rising  
410 epidemic of HIV-1 infections among general populations in Fujian, China. *J Acquir*  
411 *Immune Defic Syndr* **60**:328-335.
- 412 27. **Qin C, Zhang P, Zhu W, Hao F, Gu A, Fen P, Zhu X, Du H.** 2016. HIV-1 diversity in  
413 infected individuals in Suzhou and Suqian, China. *Springerplus* **5**:886.
- 414 28. **Zeng P, Liu Y, He M, Wang J, Keating S, Mao W, Huang M, Ma H, He W, Bi X, Liao D,**  
415 **Busch M, Ness P, Liu J, Shan H.** 2017. The infection staging and profile of genotypic  
416 distribution and drug resistance mutation among the human immunodeficiency virus-1  
417 infected blood donors from five Chinese blood centers, 2012-2014. *PLoS One*  
418 **12**:e0179328.
- 419 29. **Liu Y, Wang J, Huang Y, Yang T, Guo X, Li J, Wen G, Yun Z, Zeng P, He M, Xu M, Liu G, Ke**  
420 **L, Wright D, Liu J, Nelson K, Shan H.** 2012. Molecular epidemiological study of hepatitis  
421 B virus in blood donors from five Chinese blood centers. *Arch Virol* **157**:1699-1707.
- 422 30. **Ogura Y, Kurosaki M, Asahina Y, Enomoto N, Marumo F, Sato C.** 1999. Prevalence and  
423 significance of naturally occurring mutations in the surface and polymerase genes of  
424 hepatitis B virus. *J Infect Dis* **180**:1444-1451.
- 425 31. **Song BC, Kim SH, Kim H, Ying YH, Kim HJ, Kim YJ, Yoon JH, Lee HS, Cha CY, Kook YH,**  
426 **Kim BJ.** 2005. Prevalence of naturally occurring surface antigen variants of hepatitis B  
427 virus in Korean patients infected chronically. *J Med Virol* **76**:194-202.

- 428 32. **Roque-Afonso AM, Férey MP, Ly TD, Graube A, Costa-Faria L, Samuel D, Dussaix E.**  
429 2007. Viral and clinical factors associated with surface gene variants among hepatitis B  
430 virus carriers. *Antivir Ther* **12**:1255-1263.
- 431 33. **Avellon A, Echevarria JM.** 2006. Frequency of hepatitis B virus 'a' determinant variants  
432 in unselected Spanish chronic carriers. *J Med Virol* **78**:24-36.
- 433 34. **Mayerat C, Mantegani A, Frei PC.** 1999. Does hepatitis B virus (HBV) genotype influence  
434 the clinical outcome of HBV infection? *J Viral Hepat* **6**:299-304.
- 435 35. **Du G, Li X, Musa TH, Ji Y, Wu B, He Y, Ni Q, Su L, Li W, Ge Y.** 2019. The nationwide  
436 distribution and trends of hepatitis C virus genotypes in mainland China. *J Med Virol*  
437 **91**:401-410.
- 438 36. **Lu L, Wang M, Xia W, Tian L, Xu R, Li C, Wang J, Rong X, Xiong H, Huang K, Huang J,**  
439 **Nakano T, Bennett P, Zhang Y, Zhang L, Fu Y.** 2014. Migration patterns of hepatitis C  
440 virus in China characterized for five major subtypes based on samples from 411  
441 volunteer blood donors from 17 provinces and municipalities. *J Virol* **88**:7120-7129.
- 442 37. **Li L, Chen L, Liang S, Liu W, Li T, Liu Y, Li H, Bao Z, Wang X, Li J.** 2013. Subtype CRF01\_AE  
443 dominate the sexually transmitted human immunodeficiency virus type 1 epidemic in  
444 Guangxi, China. *J Med Virol* **85**:388-395.
- 445 38. **Li L, Wei D, Hsu WL, Li T, Gui T, Wood C, Liu Y, Li H, Bao Z, Liu S, Wang X, Li J.** 2015.  
446 CRF07\_BC Strain Dominates the HIV-1 Epidemic in Injection Drug Users in Liangshan  
447 Prefecture of Sichuan, China. *AIDS Res Hum Retroviruses* **31**:479-487.
- 448 39. **Hemelaar J, Gouws E, Ghys PD, Osmanov S.** 2011. Global trends in molecular  
449 epidemiology of HIV-1 during 2000-2007. *AIDS* **25**:679-689.
- 450 40. **Locarnini SA.** 2002. Clinical relevance of viral dynamics and genotypes in hepatitis B  
451 virus. *J Gastroenterol Hepatol* **17 Suppl 3**:S322-328.
- 452 41. **Kobayashi M, Arase Y, Ikeda K, Tsubota A, Suzuki Y, Saitoh S, Kobayashi M, Suzuki F,**  
453 **Akuta N, Someya T, Matsuda M, Sato J, Kumada H.** 2002. Clinical characteristics of  
454 patients infected with hepatitis B virus genotypes A, B, and C. *J Gastroenterol* **37**:35-39.
- 455 42. **Echevarria JM, Avellon A.** 2006. Hepatitis B virus genetic diversity. *J Med Virol* **78 Suppl**  
456 **1**:S36-42.
- 457
